# Supplementary material for: Distribution and diversity of ROS-generating enzymes across the animal kingdom, with a focus on sponges (Porifera)
Source: PubMed Central journal article supplement (PMC9524095; doi:10.1186/s12915-022-01414-z), 2022-09-30
Supplement: 12915_2022_1414_MOESM1_ESM.pdf [file 12915_2022_1414_MOESM1_ESM.pdf]

**Table S1. Details of the genomes used in this study.**

| <b>Species</b>                       | <b>Phyla</b> | <b>Website/source</b>                                                                                                                                                 |
|--------------------------------------|--------------|-----------------------------------------------------------------------------------------------------------------------------------------------------------------------|
| <i>Amphimedon queenslandica</i>      | Porifera     | <a href="http://metazoa.ensembl.org/Amphimedon_queenslandica/Info/Index">http://metazoa.ensembl.org/Amphimedon_queenslandica/Info/Index</a>                           |
| <i>Xestospongia bergquistia</i>      | Porifera     | Data available from the authors on request                                                                                                                            |
| <i>Tethya wilhelma</i>               | Porifera     | <a href="http://tethya.spongebase.net/">http://tethya.spongebase.net/</a>                                                                                             |
| <i>Ephydatia muelleri</i>            | Porifera     | <a href="https://spaces.facsci.ualberta.ca/ephybase/">https://spaces.facsci.ualberta.ca/ephybase/</a>                                                                 |
| <i>Oscarella carmela</i>             | Porifera     | <a href="http://compagen.unit.oist.jp/index.html">http://compagen.unit.oist.jp/index.html</a>                                                                         |
| <i>Sycon ciliatum</i>                | Porifera     | <a href="http://compagen.unit.oist.jp/index.html">http://compagen.unit.oist.jp/index.html</a>                                                                         |
| <i>Mnemiopsis leidyi</i>             | Ctenophora   | <a href="https://research.nhgri.nih.gov/mnemiopsis/">https://research.nhgri.nih.gov/mnemiopsis/</a>                                                                   |
| <i>Nematostella vectensis</i>        | Cnidaria     | <a href="https://www.ebi.ac.uk/ena/browser/view/GCA_000209225.1?show=blobtoolkit">https://www.ebi.ac.uk/ena/browser/view/GCA_000209225.1?show=blobtoolkit</a>         |
| <i>Acanthaster planci</i>            | Echinoderm   | <a href="https://marinegenomics.oist.jp/cots/viewer/info?project_id=46">https://marinegenomics.oist.jp/cots/viewer/info?project_id=46</a>                             |
| <i>Strongylocentrotus purpuratus</i> | Echinoderm   | <a href="https://www.ebi.ac.uk/ena/browser/view/GCA_000002235.4?show=blobtoolkit">https://www.ebi.ac.uk/ena/browser/view/GCA_000002235.4?show=blobtoolkit</a>         |
| <i>Branchiostoma floridae</i>        | Chordata     | <a href="https://mycocosm.jgi.doe.gov/Brafl1/Brafl1_home.html">https://mycocosm.jgi.doe.gov/Brafl1/Brafl1_home.html</a>                                               |
| <i>Ciona intestinalis</i>            | Chordata     | <a href="https://www.ebi.ac.uk/ena/browser/view/GCA_000224145.1">https://www.ebi.ac.uk/ena/browser/view/GCA_000224145.1</a>                                           |
| <i>Capitella teleta</i>              | Annelida     | <a href="https://www.ebi.ac.uk/ena/browser/view/GCA_000328365.1?show=blobtoolkit">https://www.ebi.ac.uk/ena/browser/view/GCA_000328365.1?show=blobtoolkit</a>         |
| <i>Lingula anatina</i>               | Brachipoda   | <a href="https://www.ebi.ac.uk/ena/browser/view/GCA_001039355.1">https://www.ebi.ac.uk/ena/browser/view/GCA_001039355.1</a>                                           |
| <i>Caenorhabditis elegans</i>        | Nematoda     | <a href="https://downloads.wormbase.org/releases/WS279/species/c_elegans/PRJNA13758/">https://downloads.wormbase.org/releases/WS279/species/c_elegans/PRJNA13758/</a> |
| <i>Drosophila melanogaster</i>       | Arthropoda   | <a href="https://flybase.org/">https://flybase.org/</a> (release dmel_r6.32 (FB2020_01))                                                                              |
| <i>Danio rerio</i>                   | Chordata     | <a href="https://www.ncbi.nlm.nih.gov/grc/zebrafish">https://www.ncbi.nlm.nih.gov/grc/zebrafish</a>                                                                   |
| <i>Xenopus tropicalis</i>            | Chordata     | <a href="http://www.xenbase.org/">http://www.xenbase.org/</a>                                                                                                         |
| <i>Homo sapiens</i>                  | Chordata     | <a href="https://www.ncbi.nlm.nih.gov/grc/human">https://www.ncbi.nlm.nih.gov/grc/human</a>                                                                           |

**Table S2. Details of sequences used from species for evolutionary comparison.** Sequences were obtained from either the UniProt data base <https://www.uniprot.org/> or NCBI <https://www.ncbi.nlm.nih.gov/>

| Species                                      | Phylum                          | Gene ID    | Uniprot accession |
|----------------------------------------------|---------------------------------|------------|-------------------|
| <i>Pseudanabaena.ABRG5-3</i>                 | Cyanobacteria                   | CuZnSOD    | A0A2Z5WSM0        |
| <i>Pseudanabaena.PCC7367</i>                 | Cyanobacteria                   | CuZnSOD    | K9SG01            |
| <i>Pseudanabaena.PCC7429</i>                 | Cyanobacteria                   | CuZnSOD    | L8N810            |
| <i>Pseudanabaena.SR411</i>                   | Cyanobacteria                   | CuZnSOD    | A0A256BEG9        |
| <i>Pseudanabaena.ABRG5-3.sodB</i>            | Cyanobacteria                   | MnSOD      | A0A2Z5WSL4        |
| <i>Pseudanabaena.PCC7367</i>                 | Cyanobacteria                   | MnSOD      | K9SFI2            |
| <i>Pseudanabaena.PCC7429</i>                 | Cyanobacteria                   | MnSOD      | L8MYC0            |
| <i>Pseudanabaena.SR411</i>                   | Cyanobacteria                   | MnSOD      | A0A256BCV0        |
| <i>Gloeobacter.kilaeensis.JS1.SODC</i>       | Cyanobacteria                   | CuZnSOD    | U5QI46            |
| <i>Gloeobacter.kilaeensis.JS1.GKIL_3379</i>  | Cyanobacteria                   | CuZnSOD    | U5QPK5            |
| <i>Gloeobacter.violaceus.PCC7421.glr2170</i> | Cyanobacteria                   | CuZnSOD    | Q7NIL3            |
| <i>Gloeobacter.violaceus.PCC7421.glr1981</i> | Cyanobacteria                   | CuZnSOD    | Q7NJ51            |
| <i>Gloeobacter.violaceus.PCC7421.sodB</i>    | Cyanobacteria                   | MnSOD      | Q7NDA9            |
| <i>Gloeobacter.kilaeensis.JS1.sodA</i>       | Cyanobacteria                   | MnSOD      | U5QI99            |
| <i>Gloeobacter.violaceus.PCC7421.sodB</i>    | Cyanobacteria                   | MnSOD      | Q7NMT3            |
| <i>Algoriphagus machipongonensis</i>         | Bacteroidetes                   | MnSOD      | A3HUU8            |
| <i>Arabidopsis thaliana</i>                  | Spermatophyta                   | CuZnSOD_1  | P24704            |
| <i>Arabidopsis thaliana</i>                  | Spermatophyta                   | CuZnSOD_2  | O78310            |
| <i>Arabidopsis thaliana</i>                  | Spermatophyta                   | RBOHD      | Q9FIJ0            |
| <i>Arabidopsis thaliana</i>                  | Spermatophyta                   | RBOHF      | O48538            |
| <i>Arabidopsis thaliana</i>                  | Spermatophyta                   | RBOHC      | O81210            |
| <i>Arabidopsis thaliana</i>                  | Spermatophyta                   | RBOHB      | Q9SBI0            |
| <i>Arabidopsis thaliana</i>                  | Spermatophyta                   | RBOHA      | O81209            |
| <i>Arabidopsis thaliana</i>                  | Spermatophyta                   | RBOHE      | O81211            |
| <i>Podospora anserina</i>                    | Ascomycota (filamentous fungus) | CuZnSOD_1  | Q711T9            |
| <i>Podospora anserina</i>                    | Ascomycota (filamentous fungus) | CuZnSOD_2  | B2ATY8            |
| <i>Podospora anserina</i>                    | Ascomycota (filamentous fungus) | MnSOD_1    | Q711T6            |
| <i>Podospora anserina</i>                    | Ascomycota (filamentous fungus) | MnSOD_2    | Q9C208            |
| <i>Podospora anserina</i>                    | Ascomycota (filamentous fungus) | NOX3(C/D)  | B2AAS7            |
| <i>Podospora anserina</i>                    | Ascomycota (filamentous fungus) | NOX2 (A/B) | B2AL10            |
| <i>Podospora anserina</i>                    | Ascomycota (filamentous fungus) | NOX1 (A/B) | B2AA06            |
| <i>Phaeosphaeria nodorum</i>                 | Ascomycota (Sac fungi)          | CuZnSOD_1  | Q0UEY3            |
| <i>Phaeosphaeria nodorum</i>                 | Ascomycota (Sac fungi)          | CuZnSOD_2  | Q0UPE0            |
| <i>Phaeosphaeria nodorum</i>                 | Ascomycota (Sac fungi)          | CuZnSOD_3  | Q0UD72            |
| <i>Phaeosphaeria nodorum</i>                 | Ascomycota (Sac fungi)          | CuZnSOD_4  | Q0UMZ2            |
| <i>Chondrus crispus</i>                      | Red algae (Irish moss)          | CuZnSOD_1  | R7QQ00            |

|                                 |                          |                |                       |
|---------------------------------|--------------------------|----------------|-----------------------|
| <i>Chondrus crispus</i>         | Red algae (Irish moss)   | CuZnSOD_2      | R7QRY5                |
| <i>Chondrus crispus</i>         | Red algae (Irish moss)   | MnSOD_1        | R7QCE3                |
| <i>Chondrus crispus</i>         | Red algae (Irish moss)   | MnSOD_2        | R7QI02                |
| <i>Chondrus crispus</i>         | Red algae (Irish moss)   | NOX_rboh (C/D) | Q2FA46                |
| <i>Pyropia yezoensis</i>        | Red algae (glume blotch) | MnSOD          | Q3YB09                |
| <i>Pyropia yezoensis</i>        | Red algae (glume blotch) | NOX_rboh (C/D) | Q2F9N3                |
| <i>Dictyostelium discoideum</i> | Amoebozoa                | CuZnSOD_1      | Q55GQ5                |
| <i>Dictyostelium discoideum</i> | Amoebozoa                | CuZnSOD_2      | Q54TU5                |
| <i>Dictyostelium discoideum</i> | Amoebozoa                | CuZnSOD_3      | Q54G70                |
| <i>Dictyostelium discoideum</i> | Amoebozoa                | CuZnSOD_4      | Q54TW8                |
| <i>Dictyostelium discoideum</i> | Amoebozoa                | MnSOD          | Q55BJ9                |
| <i>Dictyostelium discoideum</i> | Amoebozoa                | NOXA           | Q9XYS3                |
| <i>Dictyostelium discoideum</i> | Amoebozoa                | NOXB           | Q86GL4                |
| <i>Dictyostelium discoideum</i> | Amoebozoa                | NOXC           | Q54F44                |
| <i>Fonticula alba</i>           | Amoebozoa                | CuZnSOD_1      | A0A058ZE05            |
| <i>Monosiga brevicollis</i>     | Choanoflagellata         | MnSOD          | A9VBJ0                |
| <i>Trichoplax adhaerens</i>     | Placozoa                 | CuZnSOD        | B3S9R7                |
| <i>Trichoplax adhaerens</i>     | Placozoa                 | MnSOD_1        | Q55BJ9                |
| <i>Trichoplax adhaerens</i>     | Placozoa                 | MnSOD_2        | B3SFQ5                |
| <i>Trichoplax adhaerens</i>     | Placozoa                 | MnSOD_3        | B3SFI3                |
| <i>Bombyx mori</i>              | Arthropoda               | BmSOD6 (Rsod)  | A0A455R4Z2            |
|                                 |                          |                | <b>NCBI accession</b> |
| <i>Monosiga brevicollis</i>     | Choanoflagellata         | NOX1(A/B)      | XP_001746171.1        |
| <i>Monosiga brevicollis</i>     | Choanoflagellata         | NOX2           | XP_001748123.1        |
| <i>Trichoplax adhaerens</i>     | Placozoa                 | NOX_1(NOX5)    | XP_002115436.1        |
| <i>Trichoplax adhaerens</i>     | Placozoa                 | NOX_2          | XP_002112911.1        |

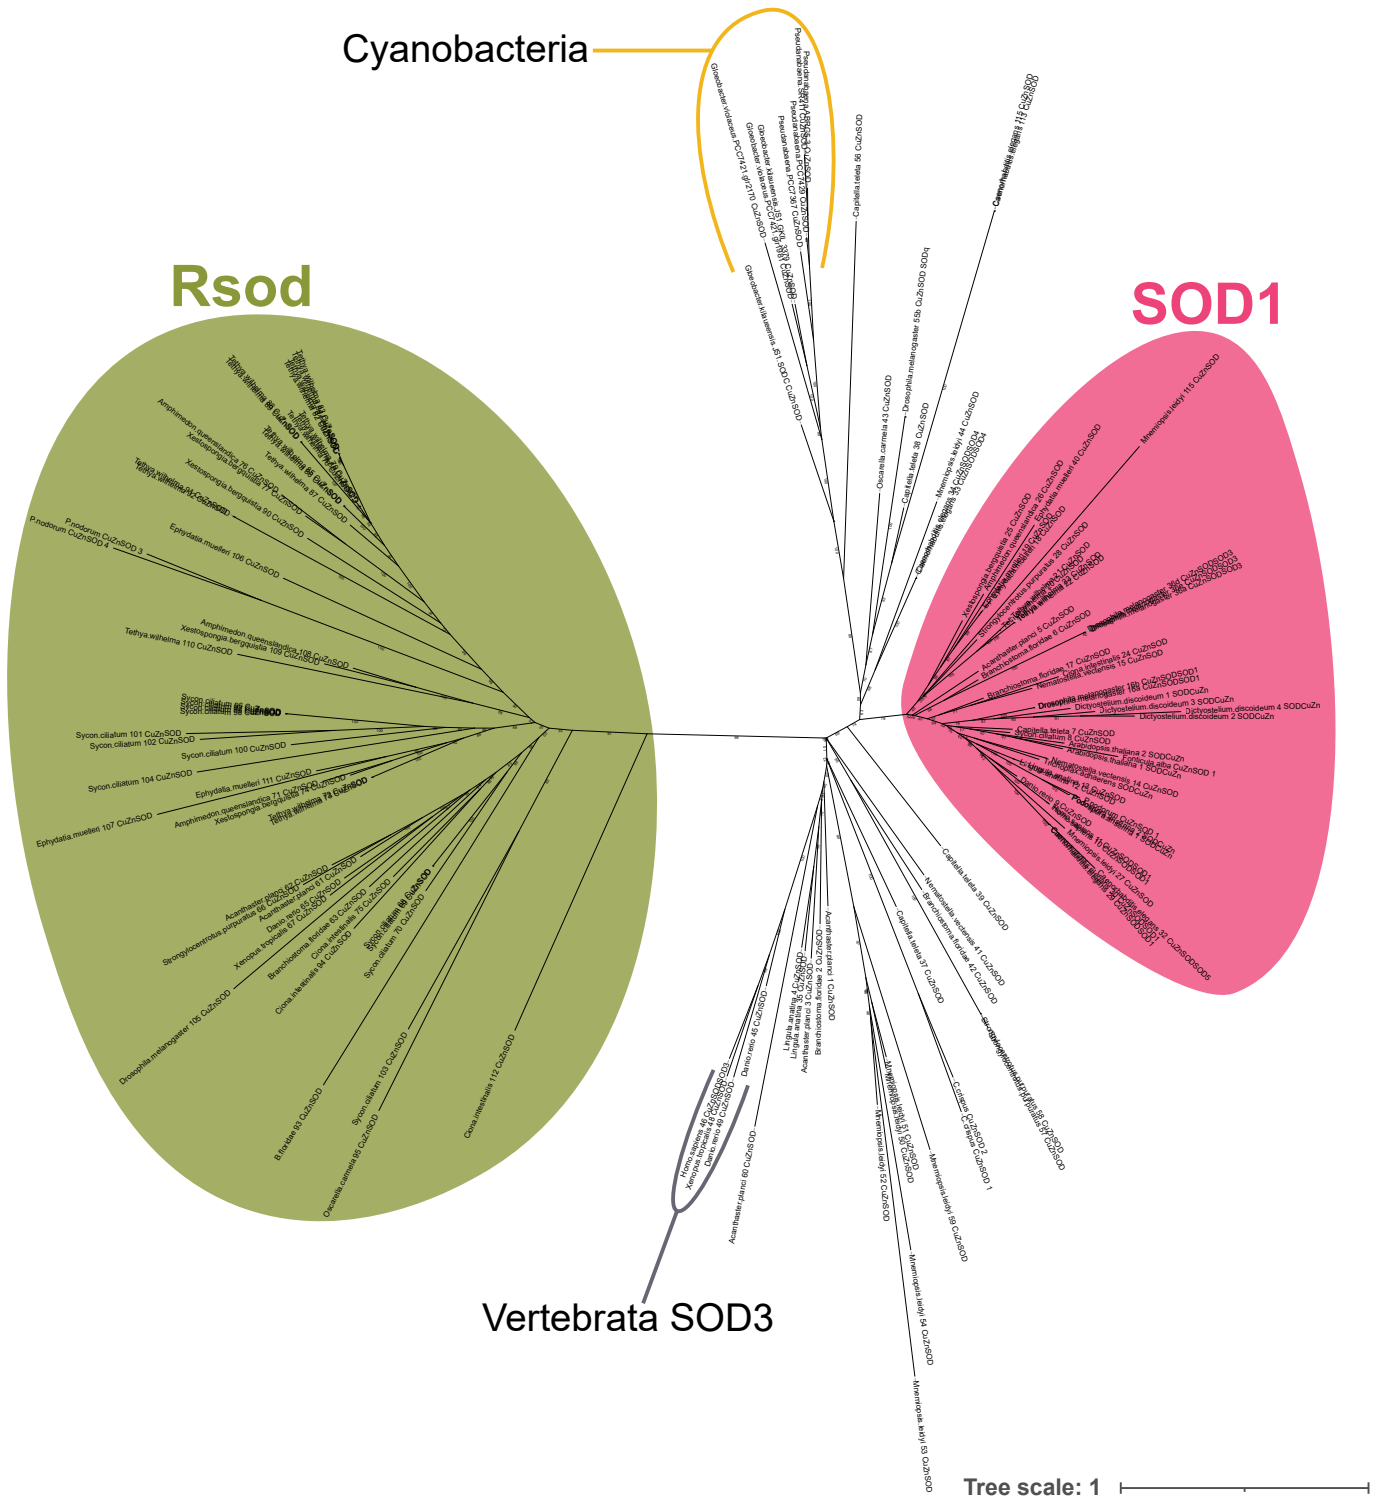

**Figure S1. Maximum likelihood phylogenetic tree of CuZnSOD enzyme family.** Black numbers on branches indicate bootstrap support. Filled in coloured shapes indicate monophyletic group; SOD1 (pink), and Rsod (green). SOD3 sequences from Vertebrata and CuZnSOD sequences from ancestral cyanobacteria, *Pseudanabaena* sp. and *Gloeobacter violaceus* [40] are indicated. Constructed based on edited alignment (Additional file 5), 1000 bb and the WAG+R5 evolutionary model.

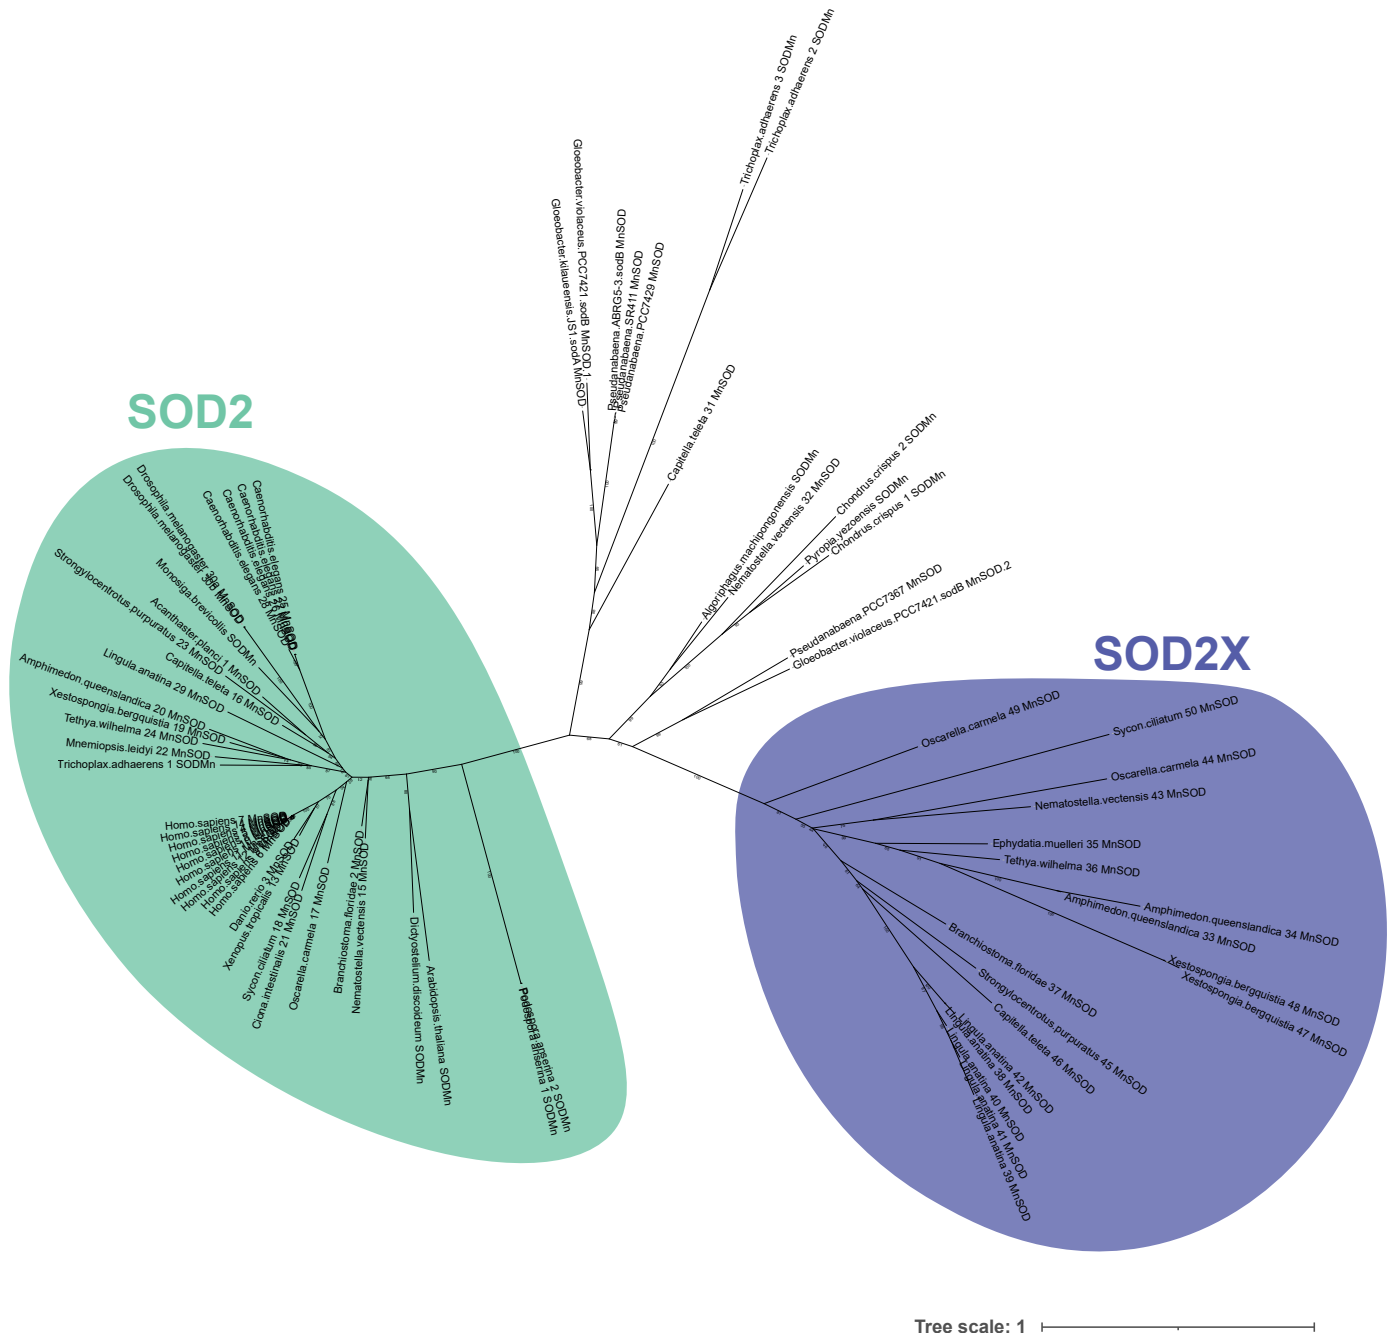

**Figure S2. Maximum likelihood phylogenetic tree of MnSOD enzyme family.** Black numbers on branches indicate bootstrap support. Filled in coloured shapes indicate monophyletic group; SOD2 (turquoise), and SOD2X (purple). Constructed based on edited alignment (Additional file 5), 1000 bb and the WAG+I+G4 evolutionary model.
